# Supplementary material for: A Study of Diagnostic Accuracy Using a Chemical Sensor Array and a Machine Learning Technique to Detect Lung Cancer
Source: PubMed Central journal article supplement (PMC6164114; doi:10.3390/s18092845), 2018-08-28
Supplement: sensors-18-02845-s001.pdf [file sensors-18-02845-s001.pdf]

# A Study of Diagnostic Accuracy Using a Chemical Sensor Array and a Machine Learning Technique to Detect Lung Cancer

Chi-Hsiang Huang <sup>1,2</sup>, Chian Zeng <sup>3</sup>, Yi-Chia Wang <sup>1,2</sup>, Hsin-Yi Peng <sup>3</sup>, Chia-Sheng Lin <sup>4</sup>,  
Che-Jui Chang <sup>3,5</sup> and Hsiao-Yu Yang <sup>3,6\*</sup>

<sup>1</sup> Department of Anesthesiology, National Taiwan University College of Medicine, Taipei 10051, Taiwan; [chhuang@ntu.edu.tw](mailto:chhuang@ntu.edu.tw) (C.-H.H.); [yichiawang@ntu.edu.tw](mailto:yichiawang@ntu.edu.tw) (Y.-C.W.)

<sup>2</sup> Department of Anesthesiology, National Taiwan University Hospital, Taipei 10048, Taiwan

<sup>3</sup> Institute of Occupational Medicine and Industrial Hygiene, National Taiwan University College of Public Health, Taipei 10055, Taiwan; [michellzeng0912@gmail.com](mailto:michellzeng0912@gmail.com) (C.Z.); [yope159@gmail.com](mailto:yope159@gmail.com) (H.-Y.P.); [L1204366@gmail.com](mailto:L1204366@gmail.com) (C.-J.C.)

<sup>4</sup> Department of Clinical Laboratory Sciences and Medical Biotechnology, National Taiwan University, Taipei 10051, Taiwan; [b04404046@ntu.edu.tw](mailto:b04404046@ntu.edu.tw) (C.-S. L.)

<sup>5</sup> Department of Family Medicine, National Taiwan University Hospital, Taipei 10048, Taiwan

<sup>6</sup> Department of Public Health, National Taiwan University College of Public Health, Taipei 10055, Taiwan

\* Correspondence: [hyang@ntu.edu.tw](mailto:hyang@ntu.edu.tw) (H.-Y.Y.); Tel.: +886-2-3366-8102

**Table S1.** Comparison of diagnostic tests for lung cancer using gas sensor arrays.

| <b>Author</b>         | <b>Year</b> | <b>Cancer subjects</b> | <b>Control subjects</b> | <b>Breath sampling</b>                    | <b>Sensor</b>               | <b>Temperature/humidity</b> | <b>Use of validation</b> | <b>Accuracy</b>                          |
|-----------------------|-------------|------------------------|-------------------------|-------------------------------------------|-----------------------------|-----------------------------|--------------------------|------------------------------------------|
| Di Natale et al. [1]  | 2003        | 35                     | 18                      | Mix air                                   | Quartz crystal microbalance | Unknown                     | Internal                 | Sensitivity: 100%<br>Specificity: 94%    |
| Machado et al. [2]    | 2005        | 14                     | 62 (other disease)      | Mix air                                   | Conductive polymer          | Unknown                     | External                 | Sensitivity: 71.4%<br>Specificity: 91.9% |
| Mazzone et al. [3]    | 2007        | 49                     | 94 (other disease)      | Mix air                                   | Chemically sensitive spots  | Unknown                     | Internal                 | Sensitivity: 73.3%<br>Specificity: 72.4% |
| Dragonieri et al. [4] | 2009        | 10                     | 10                      | Mix air                                   | Conductive polymer          | Unknown                     | Internal                 | Accuracy: 90%                            |
| D'Amico et al. [5]    | 2010        | 28                     | 36                      | Alveolar air                              | Quartz crystal microbalance | Unknown                     | Internal                 | Sensitivity: 85%<br>Specificity: 100%    |
| Santonico et al. [6]  | 2012        | 20                     | 10                      | Alveolar air (bag breath sampling)        | Quartz crystal microbalance | Unknown                     | Internal validation      | Sensitivity: 85%<br>Specificity: 85%     |
|                       |             |                        |                         | Alveolar air (endoscopic breath sampling) |                             |                             | Internal validation      | Sensitivity: 97.5%<br>Specificity: 75%   |
| Hubers et al. [7]     | 2014        | 18                     | 8                       | Mix air                                   | Conductive polymer          | Unknown                     | Internal                 | Sensitivity: 94%<br>Specificity: 13%     |
| Rocco et al. [8]      | 2016        | 23                     | 77                      | Mix air                                   | Acoustic-mass               | 20~22°C                     | Internal                 | Sensitivity: 86%<br>Specificity: 95%     |

|                         |      |                       |                        |              |                             |         |          |                                          |
|-------------------------|------|-----------------------|------------------------|--------------|-----------------------------|---------|----------|------------------------------------------|
| Gasparri et al. [9]     | 2016 | 70                    | 76                     | Alveolar air | Quartz crystal microbalance | Unknown | Internal | Sensitivity: 81%<br>Specificity: 91%     |
| Tirzīte et al. [10]     | 2017 | 165                   | 79                     | Mix air      | Conductive polymer          | Unknown | Internal | Sensitivity: 97.8%<br>Specificity: 68.8% |
| Van de Goor et al. [11] | 2018 | 52<br>(training set)  | 93<br>(training set)   | Mix air      | Metal oxide                 | Unknown | Internal | Sensitivity: 83%<br>Specificity: 84%     |
|                         |      | 8<br>(validation set) | 14<br>(validation set) |              |                             |         | External | Sensitivity: 88%<br>Specificity: 86%     |
| Chang et al. [12]       | 2018 | 37                    | 48                     | Alveolar air | Metal oxide                 | Unknown | Internal | Sensitivity: 79%<br>Specificity: 72%     |

---

**Table S2.** Intraclass correlation coefficients (ICC) between each measurement (3<sup>rd</sup>–10<sup>th</sup>) and the second measurement (2<sup>nd</sup>) ( $n = 316$ ) using the ICC (3, k) model. S1–32: sensors 1–32.

| Sensor       | Measurement |        |        |        |        |        |        |        |
|--------------|-------------|--------|--------|--------|--------|--------|--------|--------|
|              | 3rd         | 4th    | 5th    | 6th    | 7th    | 8th    | 9th    | 10th   |
| S1           | 1           | 1      | 1      | 0.999  | 0.999  | 0.999  | 0.999  | 0.999  |
| S2           | 1           | 1      | 1      | 1      | 1      | 1      | 0.999  | 0.999  |
| S3           | 1           | 1      | 1      | 1      | 1      | 0.999  | 0.999  | 0.999  |
| S4           | 1           | 0.999  | 0.999  | 0.999  | 0.999  | 0.998  | 0.998  | 0.998  |
| S5           | 1           | 0.999  | 0.998  | 0.997  | 0.996  | 0.995  | 0.994  | 0.993  |
| S6           | 0.998       | 0.994  | 0.993  | 0.99   | 0.988  | 0.987  | 0.987  | 0.986  |
| S7           | 1           | 0.999  | 0.999  | 0.999  | 0.998  | 0.998  | 0.998  | 0.997  |
| S8           | 0.996       | 0.995  | 0.994  | 0.994  | 0.994  | 0.993  | 0.993  | 0.993  |
| S9           | 1           | 1      | 1      | 0.999  | 0.999  | 0.999  | 0.999  | 0.999  |
| S10          | 0.999       | 0.998  | 0.997  | 0.996  | 0.994  | 0.994  | 0.993  | 0.992  |
| S11          | 0.999       | 0.999  | 0.998  | 0.997  | 0.997  | 0.996  | 0.995  | 0.995  |
| S12          | 1           | 0.999  | 0.999  | 0.998  | 0.997  | 0.997  | 0.997  | 0.996  |
| S13          | 1           | 0.999  | 0.999  | 0.999  | 0.998  | 0.998  | 0.998  | 0.997  |
| S14          | 1           | 1      | 1      | 1      | 0.999  | 0.999  | 0.999  | 0.999  |
| S15          | 0.999       | 0.999  | 0.998  | 0.997  | 0.996  | 0.995  | 0.995  | 0.995  |
| S16          | 1           | 0.999  | 0.999  | 0.998  | 0.998  | 0.997  | 0.997  | 0.996  |
| S17          | 1           | 0.999  | 0.999  | 0.999  | 0.998  | 0.998  | 0.998  | 0.997  |
| S18          | 0.999       | 0.996  | 0.996  | 0.994  | 0.993  | 0.993  | 0.993  | 0.991  |
| S19          | 1           | 0.999  | 0.999  | 0.999  | 0.998  | 0.998  | 0.997  | 0.997  |
| S20          | 1           | 1      | 0.999  | 0.999  | 0.999  | 0.999  | 0.998  | 0.998  |
| S21          | 1           | 0.999  | 0.999  | 0.998  | 0.998  | 0.998  | 0.997  | 0.997  |
| S22          | 0.999       | 0.999  | 0.998  | 0.997  | 0.995  | 0.994  | 0.994  | 0.992  |
| S23          | 1           | 0.999  | 0.998  | 0.998  | 0.997  | 0.996  | 0.996  | 0.995  |
| S24          | 0.999       | 0.999  | 0.998  | 0.998  | 0.997  | 0.997  | 0.997  | 0.996  |
| S25          | 1           | 0.999  | 0.999  | 0.998  | 0.998  | 0.998  | 0.997  | 0.997  |
| S26          | 1           | 1      | 0.999  | 0.999  | 0.999  | 0.998  | 0.998  | 0.998  |
| S27          | 1           | 1      | 0.999  | 0.999  | 0.999  | 0.999  | 0.999  | 0.998  |
| S28          | 1           | 1      | 1      | 0.999  | 0.999  | 0.999  | 0.999  | 0.998  |
| S29          | 1           | 1      | 1      | 0.999  | 0.999  | 0.999  | 0.999  | 0.999  |
| S30          | 1           | 0.999  | 0.999  | 0.998  | 0.998  | 0.998  | 0.997  | 0.997  |
| S31          | 0.999       | 0.998  | 0.997  | 0.996  | 0.994  | 0.992  | 0.991  | 0.989  |
| S32          | 1           | 1      | 0.999  | 0.999  | 0.999  | 0.999  | 0.998  | 0.998  |
| <b>Mean</b>  | 1.000       | 0.999  | 0.998  | 0.998  | 0.997  | 0.997  | 0.997  | 0.996  |
| <b>± SEM</b> | ±0.001      | ±0.001 | ±0.002 | ±0.002 | ±0.003 | ±0.003 | ±0.003 | ±0.003 |
| <b>CV(%)</b> | 0.08%       | 0.14%  | 0.16%  | 0.21%  | 0.25%  | 0.28%  | 0.28%  | 0.32%  |

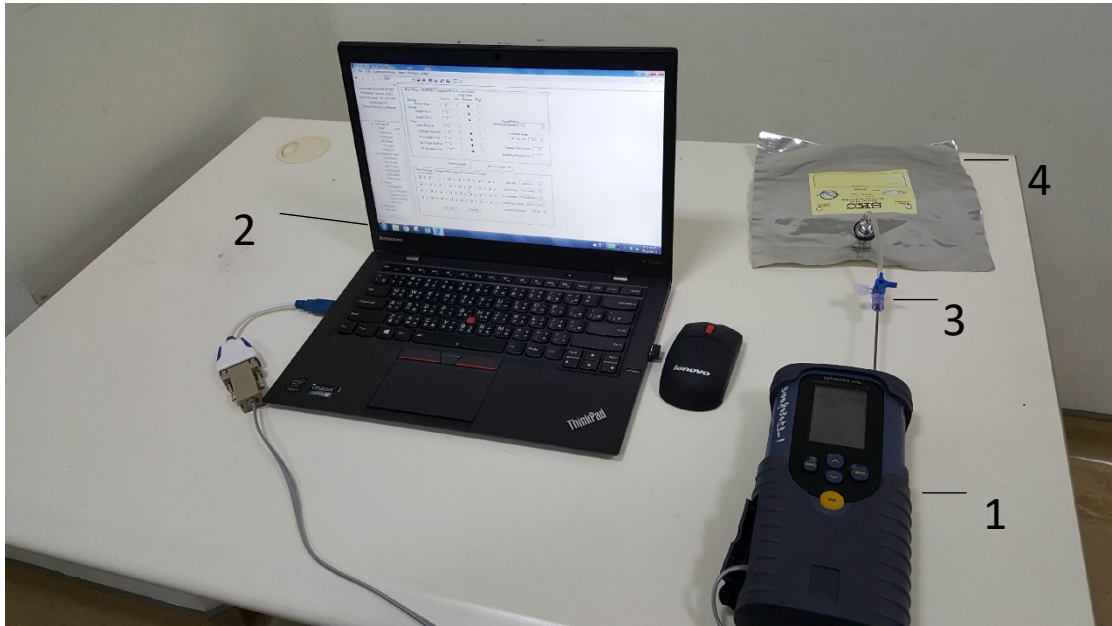

**Figure S1.** Experimental setup for the analysis of alveolar air consisting of a (1) E-nose, (2) computer, (3) three-way valve and (4) Tedlar bag.

Legend: The bags were connected with the necessary fixture, including an airtight PVC tube and a three-way valve for connection to the E-nose.

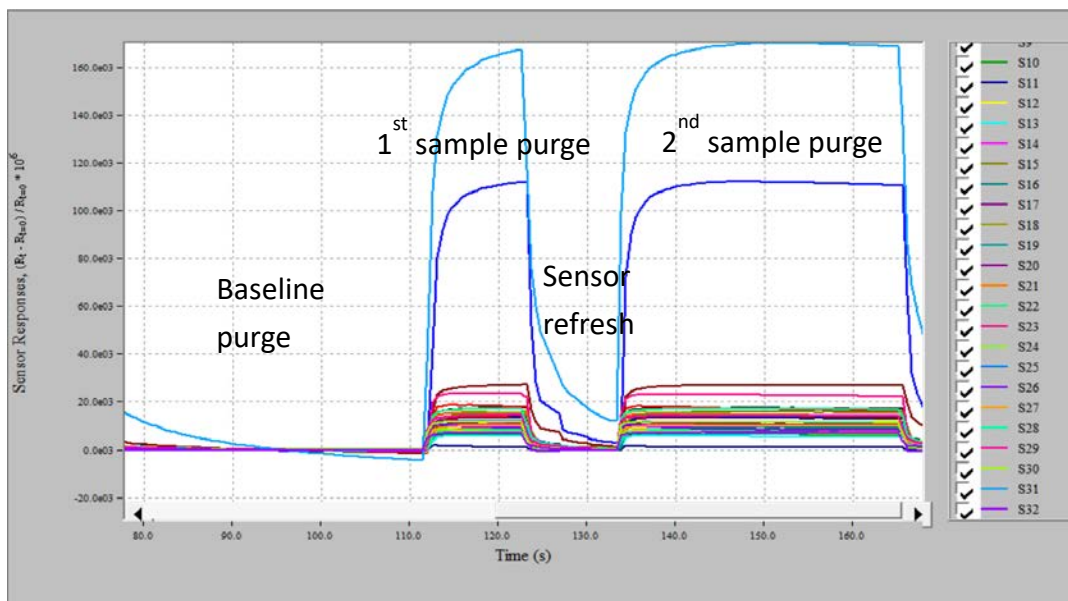

**Figure S2.** Desired waveforms for Cyranose320.

Legend: The setting comprised 10 seconds of a baseline purge and 40 seconds of a sample purge, which was sufficient for most sensors to reach the steady-state, followed by 10 seconds of a wash-out to return to the baseline.

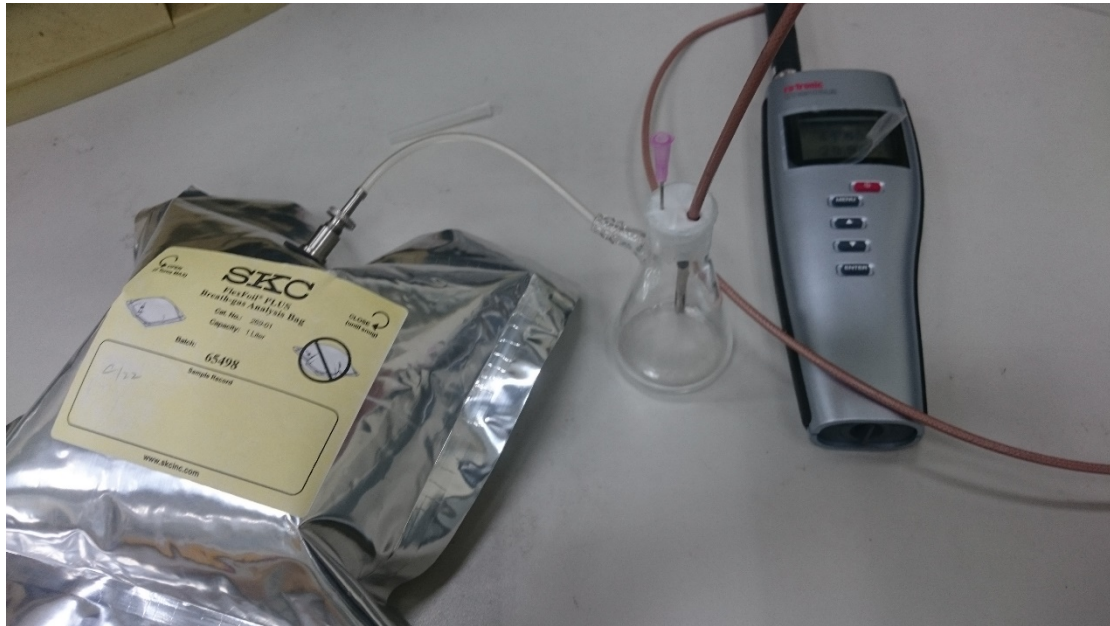

**Figure S3.** Instruments used to assess the humidity in the breath (Rotronic HygroPlan, Bassersdorf, Switzerland).

Legend: We used a humidity meter to measure the humidity in the Tedlar bag, and the mean humidity was 22.32% R. H. (R. H. was measured at 24°C).

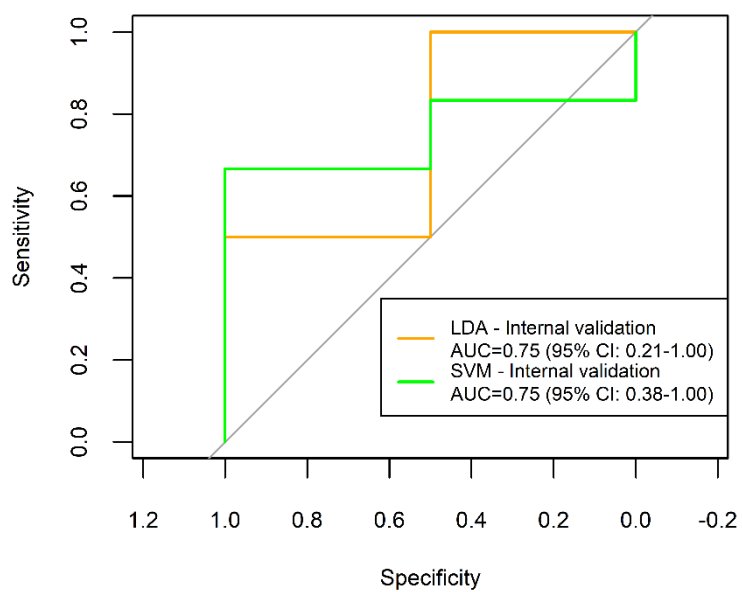

**Figure S4.** Receiver operating characteristic curves for the discriminant from healthy and diseased lungs as determined by LDA and SVM.

Legend: The VOCs collected from healthy and diseased lungs in the same subjects cannot be discriminated well by both linear and non-linear statistical methods.



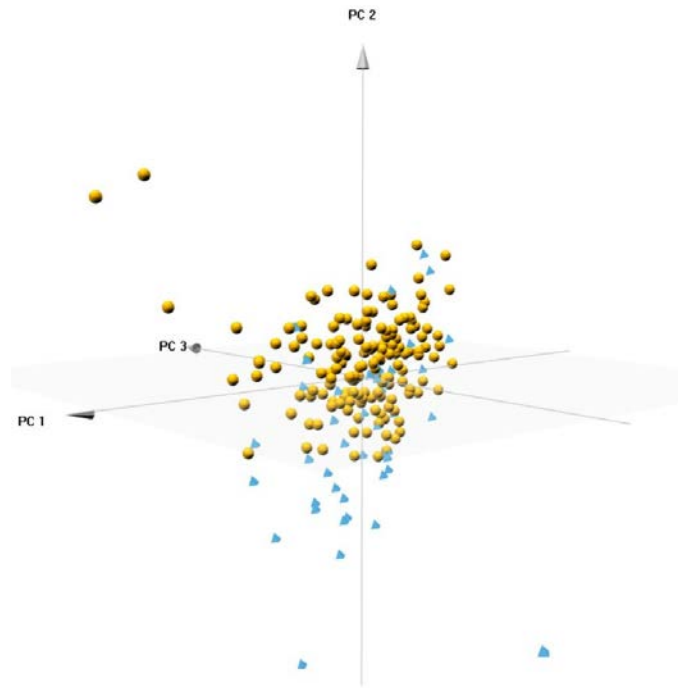

**Figure S5.** The principal component analysis shows the discrimination between cases of lung cancer and controls.

Legend: The yellow points in the right upper corner are controls, and the blue triangles in the lower portion are lung cancer cases. Using three principal components, cases and controls could be discriminated well.

## References

1. Di Natale, C.; Macagnano, A.; Martinelli, E.; Paolesse, R.; D'Arcangelo, G.; Roscioni, C.; Finazzi-Agro, A.; D'Amico, A. Lung cancer identification by the analysis of breath by means of an array of non-selective gas sensors. *Biosens. Bioelectron.* **2003**, *18*, 1209–1218.
2. Machado, R.F.; Laskowski, D.; Deffenderfer, O.; Burch, T.; Zheng, S.; Mazzone, P.J.; Mekhail, T.; Jennings, C.; Stoller, J.K.; Pyle, J.; Duncan, J.; Dweik, R.A.; Erzurum, S.C. Detection of lung cancer by sensor array analyses of exhaled breath. *Am. J. Respir. Crit. Care. Med.* **2005**, *171*, 1286–1291.
3. Mazzone, P.J.; Hammel, J.; Dweik, R.; Na, J.; Czich, C.; Laskowski, D.; Mekhail, T., Diagnosis of lung cancer by the analysis of exhaled breath with a colorimetric sensor array. *Thorax* **2007**, *62*, 565–568.
4. Dragonieri, S.; Annema, J.T.; Schot, R.; van der Schee, M.P.; Spanevello, A.; Carratu, P.; Resta, O.; Rabe, K.F.; Sterk, P.J. An electronic nose in the discrimination of patients with non-small cell lung cancer and COPD. *Lung Cancer* **2009**, *64*, 166–170.
5. D'Amico, A.; Pennazza, G.; Santonico, M.; Martinelli, E.; Roscioni, C.; Galluccio, G.; Paolesse, R.; Di Natale, C. An investigation on electronic nose diagnosis of lung cancer. *Lung Cancer* **2010**, *68*, 170–176.
6. Santonico, M.; Lucantoni, G.; Pennazza, G.; Capuano, R.; Galluccio, G.; Roscioni, C.; La Delfa, G.; Consoli, D.; Martinelli, E.; Paolesse, R.; Di Natale, C.; D'Amico, A., In situ detection of lung cancer volatile fingerprints using bronchoscopic air-sampling. *Lung Cancer* **2012**, *77*, 46–50.
7. Hubers, A.J.; Brinkman, P.; Boksem, R.J.; Rhodius, R.J.; Witte, B.I.; Zwinderman, A.H.; Heideman, D.A.; Duin, S.; Koning, R.; Steenbergen, R.D.; Sniijders, P.J.; Smit, E.F.; Sterk, P.J.; Thunnissen, E. Combined sputum hypermethylation and eNose analysis for lung cancer diagnosis. *J. Clin. Pathol.* **2014**, *67*, 707–711.
8. Rocco, R.; Incalzi, R.A.; Pennazza, G.; Santonico, M.; Pedone, C.; Bartoli, I.R.; Vernile, C.; Mangiameli, G.; La Rocca, A.; De Luca, G.; Rocco, G.; Crucitti, P. BIONOTE e-nose technology may reduce false positives in lung cancer screening programmesdagger. *Eur. J. Cardiothorac. Surg.* **2016**, *49*, 1112–1117.
9. Gasparri, R.; Santonico, M.; Valentini, C.; Sedda, G.; Borri, A.; Petrella, F.; Maisonneuve, P.; Pennazza, G.; D'Amico, A.; Di Natale, C.; Paolesse, R.; Spaggiari, L. Volatile signature for the early diagnosis of lung cancer. *J. Breath Res.* **2016**, *10*, 016007.
10. Tīrzīte, M.; Bukovskis, M.; Strazda, G.; Jurka, N.; Taivans, I., Detection of lung cancer in exhaled breath with an electronic nose using support vector machine analysis. *J. Breath Res.* **2017**, *11*, 036009.
11. Van de Goor, R.; Van Hooren, M.; Dingemans, A.M.; Kremer, B.; Kross, K., Training and validating a portable electronic nose for lung cancer screening. *J. Thorac. Oncol.* **2018**, *13*, 676–681.
12. Chang, J.-E.; Lee, D.-S.; Ban, S.-W.; Oh, J.; Jung, M.Y.; Kim, S.-H.; Park, S.; Persaud, K.; Jheon, S., Analysis of volatile organic compounds in exhaled breath for lung cancer diagnosis using a sensor system. *Sens. and Actuators B: Chem.* **2018**, *255*, 800–807.

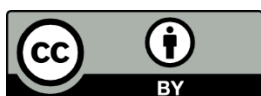

© 2018 by the authors. Submitted for possible open access publication under the terms and conditions of the Creative Commons Attribution (CC BY) license (<http://creativecommons.org/licenses/by/4.0/>).
